# Supplementary material for: A well-isolated vibrational state of CO2verified by near-infrared saturated spectroscopy with kHz accuracy
Source: Royal Society of Chemistry journal article supplement (doi:10.1039/c9cp05121j), 2020-01-01
Supplement: c9cp05121j1.pdf [file c9cp05121j1.pdf]

Supplementary Material

Positions of the lines in the 30013 ← 00001 band of  $^{12}\text{C}^{16}\text{O}_2$  and the derived ground state combination difference (in kHz)

| $J''$ | $P(J'')$           | $J''$ | $R(J'')$           | $\Delta E$       |
|-------|--------------------|-------|--------------------|------------------|
| P(2)  | 186661236665.7(11) | R(0)  | 186731427340.9(12) | 70190675.2(16)   |
| P(4)  | 186613391890.9(08) | R(2)  | 186777169015.0(08) | 163777124.1(11)  |
| P(6)  | 186564706645.0(09) | R(4)  | 186822067530.5(08) | 257360885.5(12)  |
| P(8)  | 186515180707.6(09) | R(6)  | 186866121133.0(08) | 350940425.4(12)  |
| P(10) | 186464813427.0(09) | R(8)  | 186909327632.1(08) | 444514205.1(11)  |
| P(12) | 186413603719.6(08) | R(10) | 186951684413.4(08) | 538080693.8(11)  |
| P(14) | 186361550077.9(08) | R(12) | 186993188431.7(08) | 631638353.8(11)  |
| P(16) | 186308650579.5(08) | R(14) | 187033836229.1(08) | 725185649.6(11)  |
| P(18) | 186254902891.6(09) | R(16) | 187073623938.6(09) | 818721047.0(12)  |
| P(20) | 186200304282.3(08) | R(18) | 187112547294.2(09) | 912243011.9(12)  |
| P(22) | 186144851634.9(08) | R(20) | 187150601642.5(09) | 1005750007.6(12) |
| P(24) | 186088541455.0(08) | R(22) | 187187781956.8(08) | 1099240501.8(11) |
| P(26) | 186031369891.9(08) | R(24) | 187224082851.3(09) | 1192712959.4(12) |
| P(28) | 185973332748.8(08) | R(26) | 187259498593.8(09) | 1286165845.0(12) |
| P(30) | 185914425500.9(08) | R(28) | 187294023129.1(09) | 1379597628.2(12) |
| P(32) | 185854643319.3(09) | R(30) | 187327650091.6(09) | 1473006772.3(12) |
| P(34) | 185793981085.6(09) | R(32) | 187360372830.8(08) | 1566391745.2(11) |
| P(36) | 185732433417.8(10) | R(34) | 187392184432.1(08) | 1659751014.3(13) |
| P(38) | 185669994694.2(12) | R(36) | 187423077740.9(08) | 1753083046.7(14) |
| P(40) | 185606659083.9(13) | R(38) | 187453045391.2(11) | 1846386307.3(17) |
| P(42) | 185542420563.5(14) | R(40) | 187482079833.3(11) | 1939659269.8(18) |
| P(44) | 185477272963.0(13) | R(42) | 187510173361.2(13) | 2032900398.2(18) |
| P(46) | 185411209992.1(14) | R(44) | 187537318154.2(14) | 2126108162.1(20) |
| P(48) | 185344225275.8(13) | R(46) | 187563506306.7(13) | 2219281030.9(18) |
| P(50) | 185276312395.6(15) | R(48) | 187588729869.9(19) | 2312417474.3(24) |
| P(52) | 185207464934.3(27) | R(50) | 187612980897.3(18) | 2405515963.0(32) |
| P(54) | 185137676524.8(23) | R(52) | 187636251490.8(23) | 2498574966.0(33) |
| P(56) | 185066940896.6(21) | R(54) | 187658533855.0(22) | 2591592958.4(30) |
| P(58) | 184995251945.8(31) | R(56) | 187679820349.9(20) | 2684568404.1(37) |
| P(60) | 184922603784.0(40) | R(58) | 187700103568.9(25) | 2777499784.9(47) |
| P(62) | 184848990840.9(60) | R(60) | 187719376399.2(43) | 2870385558.3(74) |

|       |                    |       |                    |                  |
|-------|--------------------|-------|--------------------|------------------|
| P(64) | 184774407896.1(90) | R(62) | 187737632115.4(41) | 2963224219.3(99) |
| P(66) | 184698850257(14)   | R(64) | 187754864470.6(52) | 3056014214(15)   |
| P(68) | 184622313787(18)   | R(66) | 187771067825.5(61) | 3148754039(19)   |
| P(70) | 184544795055(18)   | R(68) | 187786237243(14)   | 3241442188(23)   |
| P(72) | 184466291661(28)   | R(70) | 187800368730(14)   | 3334077068(32)   |
